# Supplementary material for: Validated Screening Tools for Common Mental Disorders in Low and Middle Income Countries: A Systematic Review
Source: PLoS One. 2016 Jun 16;11(6):e0156939. doi: 10.1371/journal.pone.0156939 (PMC4911088; doi:10.1371/journal.pone.0156939)
Supplement: S3 File — Quality criteria met and missed by each of the included studies. (XLSX) [file pone.0156939.s003.xlsx]

## Sheet: S3 File. Quality Appraisal
Author	Expectation Bias	Work-up Bias	Normal Range	Translation	Confidence AUC	Confidence Sens/Spec	Reproducible
Basker et al. (2007)	*	*	*	*	*	*	*
Bressan et al. (1998)	*	*	*	*	*	X	*
Chaaya et al. (2008)	*	*	*	*	*	X	*
Chishinga et al. (2011)	*	*	*	*	*	X	*
de Oliveira et al. (2010)	*	*	*	*	*	X	*
Gelaye et al. (2013)	*	*	*	*	*	*	*
Gomes-Oliveira et al. (2012)	*	*	*	*	*	X	*
Hanlon et al. (2008)	*	*	*	*	*	X	*
Kaaya et al. (2002)	*	*	*	*	*	X	*
Li et al. (2011)	*	*	*	*	*	X	*
Patel et al. (1997)	*	*	*	*	*	X	*
Weobong et al. (2009)	*	*	*	*	*	X	*
Abeyasinghe et al. (2012)	*	*	*	*	*	X	X
Abiodun (1993)	*	*	*	*	X	X	X
Abiodun (1994)	*	*	*	*	X	X	X
Abiodun (2006)	*	*	*	*	*	X	X
Adewuya et al. (2006a)	*	*	*	X	*	X	*
Akena et al. (2012)	*	*	*	*	*	X	X
Akena et al. (2013)	*	*	*	X	*	X	X
Araya et al. (1992)	*	*	*	X	*	X	X
Arunpongpaisal et al. (2009)	*	*	*	*	*	*	X
Aydin & Ulusahin (2001)	*	*	*	*	X	*	X
Baggaley et al. (2007)	*	*	*	*	X	X	X
Basker et al. (2010)	*	*	*	X	*	X	*
Basoglu et al. (2001)	*	*	*	*	X	*	X
Betancourt et al. (2012)	*	*	*	*	X	X	*
Biswas et al. (2009)	*	*	*	*	X	X	X
Brancaglion et al. (2013)	*	*	*	X	*	X	X
Caiuby et al. (2012)	*	*	*	*	X	X	X
Camacho et al. (2009)	*	*	*	X	X	X	*
Campo et al. (2006)	*	*	*	X	*	*	X
Campo-Arias et al. (2005)	*	*	*	X	*	*	X
Campo-Arias et al. (2006)	*	*	*	X	*	*	X
Campo-Arias et al. (2007)	*	*	*	X	*	*	X
Cantilino et al. (2007)	*	*	*	*	X	X	X
Castelo et al. (2010)	*	*	*	*	*	*	X
Chagas et al. (2010)	*	*	*	*	X	X	X
Chen et al. (2009)	*	*	*	X	*	X	*
Chen et al. (2010)	*	*	*	X	*	X	X
Chen et al. (2013)	*	*	*	X	*	X	*
Chibanda et al. (2010)	*	*	*	*	X	X	X
Chipimo & Fylkesnes (2010)	*	*	*	*	X	X	X
Chipimo & Fylkesnes (2013)	*	*	*	*	*	X	X
Chowdhurry et al. (2004)	*	*	*	*	*	X	X
de Oliveira et al. (2011)	*	*	*	X	*	*	X
Diaz et al. (2005)	*	*	*	X	*	*	X
Fabregas et al. (2012)	*	*	*	X	*	X	X
Fernandes et al. (2011)	*	*	*	*	X	X	X
Figueira et al. (2009)	*	*	*	*	*	X	X
Furlanetto et al. (2005)	*	*	*	X	*	X	X
Ganguly et al. (2013)	*	*	*	X	*	*	*
Gausia et al. (2007)	*	*	*	*	X	X	X
Giang et al. (2006)	*	*	*	X	*	X	X
Gonclaves et al. (2008)	*	*	*	X	*	X	X
Hollander et al. (2007)	*	*	*	*	X	X	*
Jirapramukpitak et al. (2009)	*	*	*	*	*	X	X
Jordans et al. (2008)	*	*	*	*	X	X	*
Khamseh et al. (2011)	*	*	*	*	*	*	X
Kohrt et al. (2011)	*	*	*	*	X	X	*
Kulathunga et al. (2010)	*	*	*	*	*	X	X
Lau et al. (2010)	*	*	*	*	X	X	*
Liu et al. (2007)	*	*	*	*	X	X	X
Liu et al. (2008)	*	*	*	*	X	X	X
Lotrakul et al. (2008)	*	*	*	*	X	X	X
Mahfoud et al. (2011)	*	*	*	*	X	X	X
Mbewe et al. (2013)	*	*	*	*	X	X	*
Muhwezi et al. (2007)	*	*	*	*	*	X	X
Myer et al. (2008)	*	*	*	X	X	*	X
Nakimuli-Mpungu et al. (2012)	*	*	*	*	X	X	*
Odenwald et al. (2007)	*	*	*	*	X	X	X
Oruc et al. (2008)	*	*	*	*	*	*	X
Osorio et al. (2010a)	*	*	*	*	X	X	*
Osorio et al. (2010b)	*	*	*	*	X	X	*
Osorio et al. (2011)	*	*	*	*	X	X	*
Osorio et al. (2012)	*	*	*	*	X	X	*
Ozalp et al. (2008)	*	*	*	X	*	X	X
Paradela et al. (2005)	*	*	*	X	*	X	X
Patel et al. (2007)	*	*	*	*	X	X	X
Pitanupong et al. (2007)	*	*	*	*	*	X	X
Pollock et al. (2006)	*	*	*	X	*	X	X
Pupo et al. (2011)	*	*	*	X	*	*	*
Rosliwati et al. (2008)	*	*	*	*	X	X	X
Russell et al. (2012)	*	*	*	X	*	*	X
Saipanish et al. (2009)	*	*	*	*	*	X	X
Santos et al. (2013)	*	*	*	X	*	*	X
Segopolo et al. (2009)	*	*	*	X	*	X	X
Sheng (2010)	*	*	*	*	*	X	X
Sherina et al. (2011)	*	*	*	*	X	*	X
Sherina et al. (2012a)	*	*	*	*	X	*	X
Sibai et al. (2009)	*	*	*	*	X	X	*
Stewart et al. (2009)	*	*	*	*	*	X	X
Suttajit et al. (2013)	*	*	*	*	X	X	*
Tan et al. (2013)	*	*	*	*	x	x	*
Tesfaye et al. (2010)	*	*	*	X	*	X	X
Tran et al. (2012)	*	*	*	X	*	X	X
Vittayanont et al. (2006)	*	*	*	*	*	X	X
Wang et al. (2009)	*	*	*	*	X	X	X
Xiao et al. (2009)	*	*	*	X	X	X	*
Zhang et al. (2013)	*	*	*	X	*	*	*
Zubaran et al. (2009)	*	*	*	*	*	X	X
Adewuya et al. (2005)	*	X	*	*	X	X	X
Adewuya et al. (2006b)	*	X	*	*	*	X	X
Adewuya et al. (2007)	*	X	*	X	*	X	X
Botega et al. (1998)	*	*	*	X	X	X	X
Costa et al. (2006)	*	X	*	X	*	X	X
D'El Rey & Matos (2009)	*	X	*	*	X	X	X
Lawrie et al. (1998)	*	*	*	X	X	X	X
Ludermir & Lewis (2005)	*	X	*	X	*	*	X
Mahmud et al. (2003)	*	*	*	X	X	X	X
Mari & Williams (1985)	*	*	*	X	X	X	X
Mazhari & Nakhaee (2007)	*	X	*	X	X	X	X
N Azah et al. (2005)	*	X	*	X	X	X	*
Osorio et al. (2007)	*	X	*	X	X	X	*
Pineda et al. (2002)	*	*	*	X	X	X	X
Pinho et al. (2010)	*	X	*	X	*	X	X
Salinas-Rodriguez et al. (2013)	*	*	*	X	X	X	X
Salle et al. (2012)	*	*	*	X	X	X	X
Santos et al. (2007)	*	X	*	X	*	*	X
Shamasunder et al. (1986)	*	*	*	X	X	X	X
Spies et al. (2009a)	*	*	*	X	X	X	X
Spies et al. (2009b)	*	*	*	X	X	X	X
Tran et al. (2013)	*	*	*	X	X	X	X
Tuan et al. (2004)	*	X	*	*	*	X	*
Vega-Dienstmaier et al. (2002)	*	*	*	X	X	X	X
Zhou et al. (2013)	*	*	*	X	X	X	X
Barua & Kar (2010)	*	*	X	*	*	X	X
Bhagwanjee et al. (1998)	*	*	X	*	X	X	X
Corapcioglu & Ozer (2004)	*	*	X	X	X	X	X
El-Missiry et al. (2012)	*	*	X	X	X	X	X
Mumford et al. (2005)	*	*	X	X	X	X	X
Nhiwatiwa et al. (1998)	*	*	X	*	X	X	X
Pence et al. (2012)	*	*	X	*	X	*	X
Rochat et al. (2013)	*	*	X	X	*	X	X
Rueda-Jaimes et al. (2009)	*	*	X	*	X	*	X
Rumble et al. (1996)	*	*	X	X	X	X	X
Sherina et al. (2012b)	*	*	X	*	X	*	X
Aguilar-Navarro et al. (2007)	X	*	*	*	*	X	*
Ali et al. (2013)	X	*	*	X	X	X	X
Botega et al. (1995)	X	*	X	*	X	X	X
Castro et al. (2006)	X	*	X	X	X	X	X
Fawzi et al. (2012)	X	X	X	*	X	*	*
John & Russell (2007)	X	*	*	*	X	X	*
Lee et al. (2006)	X	*	*	X	*	X	X
Malakouti et al. (2006)	X	X	*	*	X	X	*
Malakouti et al. (2007)	X	X	*	*	X	X	*
Puertas et al. (2004)	X	*	*	*	X	X	X
Scazufca et al. (2009)	X	*	*	X	*	X	X
Uwakwe (2003)	X	*	*	*	X	X	X
Yang et al. (2014)	X	*	*	X	*	X	X
Agoub et al. (2005)	X	*	*	X	X	X	X
Aydin et al. (2004)	X	*	*	*	X	X	X
Regmi et al. (2002)	X	X	*	X	X	X	X
Wulsin et al. (2002)	X	*	X	X	X	X	X

## Sheet: S3 File. Key
*	Citeria met
X	Criteria not met
	Very good quality
	Good quality
	Fair quality
	Acceptable quality
	Unblinded (blinding not reported and no response to email requests for this information)
	Unblinded (confirmed)
A detailed explanation of how study quality was decided can be found in the methods section of Ali et al. (2016).
